# Supplementary material for: Ultrafast functional profiling of RNA-seq data for nonmodel organisms
Source: HighWire-hosted journal article supplement (doi:10.1101/gr.269894.120), 2021-03-17
Supplement: Supplemental_Materials.docx [file Supplemental_Materials.docx]

**Supplemental materials**

**Seq2Fun: ultra-fast functional profiling of RNA-seq data for non-model organisms**

1Peng Liu, 1Jessica Ewald, 2, 3Jose Hector Galvez, 1Jessica Head, 4Doug Crump, 2, 3Guillaume Bourque, 1Niladri Basu, 1,2*Jianguo Xia

1Faculty of Agricultural and Environmental Sciences, McGill University, Montreal, Quebec, Canada

2Department of Human Genetics, McGill University, Montreal, Quebec, Canada

3Canadian Center for Computational Genomics, McGill University, Montreal, Quebec, Canada

4Environment and Climate Change Canada, National Wildlife Research Centre, Ottawa, Ontario, Canada

*To whom correspondence should be addressed:

Tel: 1-514-398-8668

Email: [jeff.xia@mcgill.ca](mailto:jeff.xia@mcgill.ca)

**1. Supplemental Results:**

**1.1. Details on outliers:**

For the zebrafish real dataset, the R2 value for the conventional workflow was very low (0.1988), due to one extreme outlier (K17751). The average counts identified by RSEM and conventional were 59 and 16660, respectively. To better present the comparison, this outlier was excluded from further analysis, which increased the R2 value to 0.29 for conventional. This exclusion does not change our conclusion.

For chicken real dataset, there was also an outlier (K08770) in the abundance table of the MEM mode, which had a heavy influence of the R2 value (0.65). Again, further downstream analysis of the chicken dataset excluded this outlier. The original R2 value of conventional workflow was extremely low (only 0.0062). After excluding the outlier (K12389, average count 4.33 by *RSEM* and 400794 by conventional), the R2 value was increased to 0.55, but was still substantially lower than that of Greedy mode.

Exclusion of these outliers would have negligible impacts on downstream analysis such as gene set analysis or pathway enrichment as these analyses are based on a group of genes rather than a single gene (Reimand et al. 2019). This also would have no impact on our conclusion that Seq2Fun outperforms conventional RNA-seq workflows. It is worth mentioning that the high abundance values of most outliers are wrongly assigned by either the Seq2Fun MEM mode or the conventional workflow. It is interesting to observe that such extreme outliers were not identified in the Greedy mode, which implies that the Seq2Fun Greedy mode is quite stable and reliable across different organisms.

**1.2. Difference between MEM and Greedy:**

In this study, the Seq2Fun MEM mode operated on species-specific protein databases (e.g. the mouse database for MEM mode consists of 8438 protein-coding genes assigned to KEGG orthologs for mouse). Therefore, R2 values of the MEM mode were expected to be higher than that of the Greedy mode, which operated on a comprehensive protein database excluding each organism’s own protein sequences (e.g. mouse database for Greedy mode consists of 497,999 protein-coding genes assigned to KEGG orthologs from 64 mammalian species, excluding mouse) (Table S1 and S2). This is the case for all four simulated and real-world datasets. Nonetheless, we observed that R2 values of the Greedy mode were higher than that of the MEM mode in the mouse and chicken real datasets, which is not consistent with that reported in Kaiju (Menzel et al. 2016). We speculated that one possible reason could be variations introduced by mutations and/or sequencing errors. As the RSEM does not report reads mapping information, it is hard to know the exact reasons. This deserves further investigation in the future.

**2. Supplemental Discussion:**

**2.1. Improvements for the future version:**

Reads coverage information is important for accurate mapping and quantification and is generally ignored by Seq2Fun. True expressed genes should have mapped reads relatively uniformly distributed across the whole gene rather than concentrated in several regions. PE reads information is largely the extension of reads coverage and Seq2Fun does not make full use of it, as it processes amino acid (aa) fragments from each non-overlapped PE read separately. Protein sequence matching from either read is considered as valid, which could produce some low confidence matches. This could contribute to the general low accuracy of DNA-to-protein aligners comparing with DNA-to-DNA aligners (Ye et al. 2019). If aa fragments from both PE reads match the same protein, this would give higher confidence about this translated match, otherwise, this match could be ignored. Implementation of this protein matching criteria and read coverage information in the future could further improve the accuracy of Seq2Fun, although it could incur an uncertain penalty in both runtime and memory consumption.

There are many homologous protein sequences in the protein databases, some of which are highly conserved proteins that share identical sequences and thus, considered as uninformative. In this study, we used CD-HIT (Li and Godzik 2006; Fu et al. 2012) to reduce protein redundancy at 99% similarity to remove these uninformative sequences to reduce the protein database size, which in turn speeds up Seq2Fun whilst keeping accuracy unchanged. It is true that these redundancy checks are estimated from whole protein sequences. It would be true that protein homologies are highly conserved in some regions whilst having more amino acid variance in other regions. It would therefore be possible to generate a compressed super pseudo homology protein sequence by concatenating the consensus of well conserved regions and each variant region. This would avoid the repeated non-informative search in the conserved regions and consequently save computational time and resources.

**3. Supplemental Methods:**

**3.1 More details on Seq2Fun’s translated search with MEM and Greedy mode:**

An efficient translated search (DNA-to-protein BLATX search) is the core algorithm of any modern searching tool capable of coping with the ongoing explosion of sequencing data. FM index (Ferragina and Manzini 2000) based on Burrows-Wheeler transform (BWT) (Burrows and Wheeler 1994) is a modern fast pattern searching data structure. BWT compresses and produces a reversible transformation of a block of reference sequences, which saves storage space. Moreover, this block-sorted data structure is well suited for searching short sequences in larger texts. The FM method constructs a data structure based on combination of BWT compressed data and suffix arrays. It uses the BWT to generate efficient indices and guarantees fast search with time linear to the length of the searching string without decompressing the entire sequence. It also sets various checkpoints and thus keeps the memory footprint small. Therefore, FM index has been adopted by several aligners, such as BWA (Li and Durbin 2009), bowtie for ungapped search (Langmead et al. 2009), bowtie2 for gapped searching (Langmead and Salzberg 2012), SOAP2 (Li et al. 2009), and Centrifuge (Kim et al. 2016), which enabled fast and sensitive mapping of short DNA reads to a reference genome. Similarly, it has also been used in translated search programs such as Kaiju for fast taxonomic classification of shot-gun metagenomics reads (Menzel et al. 2016). We are aware of several other high-performance aligners based on other data structures to align genomic DNA reads to microbial protein databases for shotgun metagenomics data. For example, double indexing-based DIAMOND achieves high speed but requires large memory (Ye et al. 2019). MMseq2 based on k-mer seems to require slightly less memory but is slower than DIAMOND (Ye et al. 2019). In contrast, the taxonomic classifier Kaiju (Menzel et al. 2016), could achieve high speeds and demand less memory (Ye et al. 2019). Therefore, in this study, we adopted the core algorithm of Kaiju (Menzel et al. 2016), to develop Seq2Fun.

Seq2Fun employs two modes (MEM and Greedy) for translated search (Supplemental Figure S1). Both modes start with read translation into all possible amino acid fragments from six reading frames. If there is a stop codon in any reading frame, the fragment will be split by the stop codon. All the translated fragments are then sorted by length from longest to shortest. This typically generates dozens of fragments with various lengths, only one of which is the true fragment. Therefore, we apply a filter to keep the longest amino acid fragments. In most cases, only the longest (eg. 100 bases read translated into maximum four 33 aa and two 32 aa fragments) are probable candidates for the true fragments. This hard filtering may exclude a small number of reads with true start and stop codons; however, since the filter is applied to all samples, this would have a limited impact on the calculation of relative statistics like fold change. Improvements in efficiency and performance gained by employing this filter are significant; however, we do offer the option to disable it *(--allFragments*).

After filtering, the backwards searching of MEM mode starts from the longest fragment against the reference sequences. For a query length *n* and minimum required matching length *m* (13 aa for MEM and 25 aa for Greedy by default), the first search starts from position *n* – *m +* 1to *n* (the rest of the search will cover all the positions 1 to *n* - *m*)and extends left of the query. If one or more matches are found for the maximum matching length *l* > *m*, then *m* is reset to *l* for the next round of searching for the remaining amino acid fragments if their minimum length > *l*; conversely, the searching is terminated. As long as the exact match length is larger than the *m*, the fragment(s) of the longest exact match, even with some unmatched bases at both ends in some cases, will be considered as matched. This *m* mainly governs the trade-off between sensitivity and precision. The MEM mode is fast, accurate, and designed for organisms with reference genomes in a database. However, for most non-model organisms, there are usually little or no reference resources available. Using the MEM model could cause rapid decline in sensitivity with increasing evolutionary distance between the query and subjects, which could result in many unmapped reads. Therefore, the Greedy mode is introduced to cope with this challenge, allowing a small number of amino acid mismatches between the query and subjects to help bridge the gap among evolutionarily divergent proteins (Menzel et al. 2016).

Allowing amino acid substitution in Greedy mode could result in an exponential increase in searching volume since there are 20 amino acid possibilities for every substitution. Therefore, prioritizing the most likely amino acid substitution at each position, as well as in the whole amino acid fragment, would speed up the whole searching scheme. Given that amino acid substitution in homologous sequences are not random, this observation introduces BLOSUM (blocks substitution matrix), which can be used to prioritize amino acid substitutions. The BLOSUM matrices are generated on the amino acid substitution model, and BLOSUM scores are calculated based on the relative frequencies of amino acids and their probabilities of substitution from very conserved regions of protein families (Henikoff and Henikoff 1992). BLOSUM62, built from sequences with less than 62% similarity, is among the best to detect weak sequence similarities and is the default matrix for protein BLAST.

The Greedy mode also starts by filtering the translated fragments by length and only keeps the longest fragments for subsequent searching. Instead of starting the search with the longest fragment, Greedy mode starts with the fragment with the highest BLOSUM62 score. The BLOSUM62 score of an amino acid fragment used for prioritizing searching is defined as the summation of BLOSUM62 score along the diagonal matrix of each amino acid. Fragments with higher scores are more likely to be the true one out of all the translated fragments. Seq2Fun subsequently tries to perform exact matching for all the seeds with length of 7 aa (by default) from all positions of the query with length *n* (the first seed is from positions *n* – 7 + 1 to *n,* the second seed is from *n* – 1 – 7 + 1 to *n* – 1, and so on). Then it extends matching at the left end while allowing substitutions (by default 2). If every amino acid in the fragment has an exact match with the subject, mismatches are not further considered and the Greedy mode acts just like the MEM mode. Otherwise, for each amino acid mismatch, a modified fragment with the most likely substitution is placed back in the searching list with a new lower score. Modified fragment scores (summation of BLOSUM62 score for each amino acid of modified fragment) must still be larger than a minimum score cut-off (*s =* 100 by default). This process continues until it reaches the end of the query or the maximum number of mismatches is reached. If a fragment with the highest score has a hit, the search is terminated, and the matching protein ID is assigned to this query read as long as the matching score is above the threshold score (*s*).

**3.2. Sensitivity analysis of Seq2Fun parameters:**

A sensitivity analysis for parameters that determine the minimum length, minimum BLOSUM62 score (Henikoff and Henikoff 1992), and the number of allowed mismatches showed that real datasets were less robust to parameter changes than simulated ones. Changing parameters had little impact on the simulated datasets (Supplemental Figures S3 and S4), other than slight to moderate changes for the zebrafish and roundworm results after changing the minimum length and number of mismatch parameters (Supplemental Figures S5 and S6). For the real datasets, we observed that the optimal minimum matching length fell between 22 and 25 across all the mouse, chicken and zebrafish datasets (Fig. S7 - 9), while it was 10 for the roundworm dataset. The reasons causing the inconsistence for roundworm simulated data are still known. Changing the number of mismatches had an inconsistent effect, with increasing values causing a decrease in R2 values for the mouse, chicken and roundworm datasets (Supplemental Figures S7, S8 and S10), and an increase for the fish datasets (Supplemental Figure S9). While the exact reason for this difference is unknown, we expect that it is related to evolutionary divergence of the test species compared to the species used to construct the protein database. Fish species generally have more complicated genome structures due to numerous whole genome duplication events during their long evolutionary history (Pasquier et al. 2016), so this could explain why we see a positive relationship between the number of mismatches and the R2 for the zebrafish database.

Considering the results of the parameter sensitivity analysis, we chose the following default parameter values: minimum length = 19, number of allowed mismatches = 2, and minimum BLOSUM62 score = 80 for Greedy mode and minimum length = 13 for MEM mode (data not shown). Although we observed slightly higher R2 values with a higher number of mismatches, the gains were not great enough to justify increasing the default parameter since the search time increases exponentially as the number of mismatches increase (Menzel et al. 2016).

**References**

Burrows M, Wheeler DJ. 1994. A block-sorting lossless data compression algorithm. In *Systems Research Center*, California.

Ferragina P, Manzini G. 2000. Opportunistic data structures with applications. *41st Annual Symposium on Foundations of Computer Science, Proceedings* doi:Doi 10.1109/Sfcs.2000.892127: 390-398.

Fu L, Niu B, Zhu Z, Wu S, Li W. 2012. CD-HIT: accelerated for clustering the next-generation sequencing data. *Bioinformatics* **28**: 3150-3152.

Henikoff S, Henikoff JG. 1992. Amino-Acid Substitution Matrices from Protein Blocks. *Proc Natl Acad Sci U S A* **89**: 10915-10919.

Kim D, Song L, Breitwieser FP, Salzberg SL. 2016. Centrifuge: rapid and sensitive classification of metagenomic sequences. *Genome Res* **26**: 1721-1729.

Langmead B, Salzberg SL. 2012. Fast gapped-read alignment with Bowtie 2. *Nat Methods* **9**: 357-U354.

Langmead B, Trapnell C, Pop M, Salzberg SL. 2009. Ultrafast and memory-efficient alignment of short DNA sequences to the human genome. *Genome Biol* **10**.

Li H, Durbin R. 2009. Fast and accurate short read alignment with Burrows-Wheeler transform. *Bioinformatics* **25**: 1754-1760.

Li RQ, Yu C, Li YR, Lam TW, Yiu SM, Kristiansen K, Wang J. 2009. SOAP2: an improved ultrafast tool for short read alignment. *Bioinformatics* **25**: 1966-1967.

Li W, Godzik A. 2006. Cd-hit: a fast program for clustering and comparing large sets of protein or nucleotide sequences. *Bioinformatics* **22**: 1658-1659.

Menzel P, Ng KL, Krogh A. 2016. Fast and sensitive taxonomic classification for metagenomics with Kaiju. *Nat Commun* **7**.

Pasquier J, Cabau C, Nguyen T, Jouanno E, Severac D, Braasch I, Journot L, Pontarotti P, Klopp C, Postlethwait JH et al. 2016. Gene evolution and gene expression after whole genome duplication in fish: the PhyloFish database. *BMC Genom* **17**: 368.

Reimand J, Isserlin R, Voisin V, Kucera M, Tannus-Lopes C, Rostamianfar A, Wadi L, Meyer M, Wong J, Xu C et al. 2019. Pathway enrichment analysis and visualization of omics data using g:Profiler, GSEA, Cytoscape and EnrichmentMap. *Nat Protoc* **14**: 482-517.

Ye SH, Siddle KJ, Park DJ, Sabeti PC. 2019. Benchmarking Metagenomics Tools for Taxonomic Classification. *Cell* **178**: 779-794.

**Supplemental Tables**

**Supplemental Table S1: Databases used for assessment organisms and one case study organism.** All gene/protein sequences are retrieved using KEGGREST from the KEGG database. Reference (RSEM) was used to generate ground truth; Seq2Fun (MEM) run on each organism’s own reference database; Seq2Fun (Greedy) run on a species exclusion database, which was used to mimic the non-model organism database. As Double-crested cormorant does not have a genome reference, Seq2Fun (Greedy) was run on a database consisting of all 24 bird species from the KEGG database. For the conventional workflow, KOFAMSCAN software was used for KEGG ortholog annotation against the KEGG database. Note: Conv., conventional workflow. N.A., not available. * KOFAMSCAN database consisting of eukaryotic organisms; detailed species can be seen in Table S2.

| **Organism** | **Tool** | **Number of proteins** | **Number of KEGG Orthologs** | **Reference Organisms** |
| --- | --- | --- | --- | --- |
| **Mouse** | Reference (RSEM) | 8438 | 5437 | mouse |
| Seq2Fun (MEM) | 8438 | 5437 | mouse |
| Seq2Fun (Greedy) | 497999 | 5622 | 64 mammal species (excluding mouse) |
| Conv. | N.A. | 22383 | KOFAMSCAN database* |
| **Chicken** | Reference (RSEM) | 4930 | 3920 | chicken |
| Seq2Fun (MEM) | 4930 | 3920 | chicken |
| Seq2Fun (Greedy) | 84168 | 4171 | 23 bird species (excluding chicken) |
| Conv. | N.A. | 22383 | KOFAMSCAN database* |
| **Zebrafish** | Reference (RSEM) | 6050 | 3961 | zebrafish |
| Seq2Fun (MEM) | 6050 | 3961 | zebrafish |
| Seq2Fun (Greedy) | 267954 | 4235 | 38 fish species (excluding zebrafish) |
| Conv. | N.A. | 22383 | KOFAMSCAN database* |
| **Roundworm** | Reference (RSEM) | 3081 | 2391 | zebrafish |
| Seq2Fun (MEM) | 3081 | 2391 | zebrafish |
| Seq2Fun (Greedy) | 13939 | 2950 | 38 fish species (excluding zebrafish) |
| Conv. | N.A. | 22383 | KOFAMSCAN database* |
| **Double-crested cormorant** | Seq2Fun (Greedy) | 87530 | 4177 | 24 bird species (including chicken) |

**Supplemental Table S2. List of species in databases used for Seq2Fun MEM and Greedy mode.** Note: *mouse, *chicken, *zebrafish and *roundworm are excluded for Seq2Fun's assessment on datasets of mouse, chicken, zebrafish and roundworm, respectively; but included for the usage of real non-model organisms.

| **No.** | **Mammals** | **Birds** | **Fishes** | **Nematodes** |
| --- | --- | --- | --- | --- |
| 1 | Homo sapiens | Gallus gallus* | Danio rerio* | Caenorhabditis elegans* |
| 2 | Pan troglodytes | Meleagris gallopavo | Sinocyclocheilus rhinocerous | Caenorhabditis briggsae |
| 3 | Pan paniscus | Coturnix japonica | Sinocyclocheilus anshuiensis | Brugia malayi |
| 4 | Gorilla gorilla gorilla | Numida meleagris | Sinocyclocheilus grahami | Loa loa |
| 5 | Pongo abelii | Anas platyrhynchos | Cyprinus carpio | Necator americanus |
| 6 | Nomascus leucogenys | Anser cygnoides domesticus | Ictalurus punctatus | Trichinella spiralis |
| 7 | Macaca mulatta | Taeniopygia guttata | Pangasianodon hypophthalmus |  |
| 8 | Macaca fascicularis | Lonchura striata domestica | Astyanax mexicanus |  |
| 9 | Chlorocebus sabaeus | Serinus canaria | Electrophorus electricus |  |
| 10 | Rhinopithecus roxellana | Geospiza fortis | Takifugu rubripes |  |
| 11 | Rhinopithecus bieti | Ficedula albicollis | Tetraodon nigroviridis |  |
| 12 | Callithrix jacchus | Pseudopodoces humilis | Larimichthys crocea |  |
| 13 | Saimiri boliviensis boliviensis | Parus major | Notothenia coriiceps |  |
| 14 | Mus musculus * | Cyanistes caeruleus | Maylandia zebra |  |
| 15 | Mus caroli | Corvus cornix | Oreochromis niloticus |  |
| 16 | Mus pahari | Empidonax traillii | Oryzias latipes |  |
| 17 | Rattus norvegicus | Falco peregrinus | Xiphophorus maculatus |  |
| 18 | Meriones unguiculatus | Falco cherrug | Xiphophorus couchianus |  |
| 19 | Cricetulus griseus | Columba livia | Poecilia reticulata |  |
| 20 | Nannospalax galili | Egretta garzetta | Cyprinodon variegatus |  |
| 21 | Heterocephalus glaber | Nipponia nippon | Nothobranchius furzeri |  |
| 22 | Castor canadensis | Athene cunicularia | Kryptolebias marmoratus |  |
| 23 | Oryctolagus cuniculus | Pygoscelis adeliae | Austrofundulus limnaeus |  |
| 24 | Tupaia chinensis | Apteryx mantelli mantelli | Amphiprion ocellaris |  |
| 25 | Canis familiaris |  | Cynoglossus semilaevis |  |
| 26 | Vulpes vulpes |  | Paralichthys olivaceus |  |
| 27 | Ailuropoda melanoleuca |  | Lates calcarifer |  |
| 28 | Ursus maritimus |  | Seriola dumerili |  |
| 29 | Ursus arctos horribilis |  | Seriola lalandi dorsalis |  |
| 30 | Odobenus rosmarus divergens |  | Hippocampus comes |  |
| 31 | Enhydra lutris kenyoni |  | Boleophthalmus pectinirostris |  |
| 32 | Felis catus |  | Monopterus albus |  |
| 33 | Panthera tigris altaica |  | Salmo salar |  |
| 34 | Panthera pardus |  | Oncorhynchus tshawytscha |  |
| 35 | Acinonyx jubatus |  | Salvelinus alpinus |  |
| 36 | Bos taurus |  | Esox lucius |  |
| 37 | Bos mutus |  | Scleropages formosus |  |
| 38 | Bos indicus |  | Paramormyrops kingsleyae |  |
| 39 | Bubalus bubalis |  | Latimeria chalumnae |  |
| 40 | Capra hircus |  |  |  |
| 41 | Ovis aries |  |  |  |
| 42 | Sus scrofa |  |  |  |
| 43 | Camelus ferus |  |  |  |
| 44 | Camelus dromedarius |  |  |  |
| 45 | Balaenoptera acutorostrata scammoni |  |  |  |
| 46 | Lipotes vexillifer |  |  |  |
| 47 | Orcinus orca |  |  |  |
| 48 | Delphinapterus leucas |  |  |  |
| 49 | Physeter catodon |  |  |  |
| 50 | Equus caballus |  |  |  |
| 51 | Equus przewalskii |  |  |  |
| 52 | Equus asinus |  |  |  |
| 53 | Myotis brandtii |  |  |  |
| 54 | Myotis davidii |  |  |  |
| 55 | Miniopterus natalensis |  |  |  |
| 56 | Hipposideros armiger |  |  |  |
| 57 | Desmodus rotundus |  |  |  |
| 58 | Pteropus alecto |  |  |  |
| 59 | Rousettus aegyptiacus |  |  |  |
| 60 | Manis javanica |  |  |  |
| 61 | Loxodonta africana |  |  |  |
| 62 | Trichechus manatus latirostris |  |  |  |
| 63 | Monodelphis domestica |  |  |  |
| 64 | Sarcophilus harrisii |  |  |  |
| 65 | Phascolarctos cinereus |  |  |  |
| 66 | Ornithorhynchus anatinus |  |  |  |

**Supplemental Table S3**. **Simulated and real-world datasets.** Datasets of mouse, chicken, zebrafish and roundworm were used for performance assessment of Seq2Fun, while double-crested cormorant was used as a showcase of Seq2Fun. Note: N.A. not available. * all simulated datasets did not have control and treatment groups of biological meaning. ** mouse dataset consisted of six organs/tissues (CEM, Head, Heart, PSC, Somites, Carcass) and did not have biological replicates. Chicken dataset consisted of two developmental stages of embryo. Zebrafish dataset consisted of two developmental stages of embryo (Prim_5: 24 hpf and Long_pec: 2 dpf). Samples of roundworm* (single end reads) were from the whole body, while samples of double-crested cormorant were from embryos exposed to ethinylestradiol (EE2) via egg injection.

| **Dataset** | **Groups** | **Simulated dataset*** | | **Real-world dataset** | |
| --- | --- | --- | --- | --- | --- |
| **N. of samples** | **PE Reads / sample** | **N. of samples** | **PE Reads / sample** |
| mouse | control** | 3 | 5624783 | 3 | 5000000 |
| Treatment** | 3 | 5624783 | 3 | 5000000 |
| chicken | EGKVI | 3 | 4756477 | 3 | 5000000 |
| EGKVIII | 3 | 4756477 | 3 | 5000000 |
| zebrafish | Prim_5 | 3 | 7640259 | 20 | 1276538 |
| Long_pec | 3 | 7640259 | 20 | 1276538 |
| Roundworm* | control | 3 | 2869973 | 5 | 5000000 |
| Ag nanoparticles | 3 | 2764630 | 5 | 5000000 |
| double-crested cormorant | control (DMSO) | N.A. | N.A. | 5 | 5000000 |
| EE2 (2.3 mg/ml) | N.A. | N.A. | 5 | 5000000 |
| EE2 (31.9 mg/ml) | N.A. | N.A. | 4 | 5000000 |

**Supplemental Table S4. Performance evaluation of recall and precision at reads level.** Con.: conventional workflow.

|  | **Mouse** | | | **Chicken** | | | **Zebrafish** | | | **Roundworm** | | |
| --- | --- | --- | --- | --- | --- | --- | --- | --- | --- | --- | --- | --- |
| **Seq2Fun** | | **Conv.** | **Seq2Fun** | | **Conv.** | **Seq2Fun** | | **Conv.** | **Seq2Fun** | | **Conv.** |
| **MEM** | **Greedy** | **MEM** | **Greedy** | **MEM** | **Greedy** | **MEM** | **Greedy** |
| **Simulated Datasets** | | | | | | | | | |  |  |  |
| **Recall** | 0.97 | 0.94 | 0.89 | 0.97 | 0.92 | 0.91 | 0.97 | 0.93 | 0.89 | 0.97 | 0.64 | 0.74 |
| **Precision** | 1 | 1 | 0.97 | 1 | 1 | 0.97 | 1 | 0.99 | 0.97 | 1 | 1 | 1 |
| **Real Dataset** | | | | | | | | | |  |  |  |
| **Recall** | 0.95 | 0.97 | 0.85 | 0.98 | 0.97 | 0.87 | 0.87 | 0.94 | 0.73 | 0.96 | 0.79 | 0.77 |
| **Precision** | 0.85 | 0.81 | 0.56 | 0.67 | 0.63 | 0.35 | 0.81 | 0.78 | 0.54 | 0.98 | 0.97 | 0.77 |

**Supplemental Figures**

**
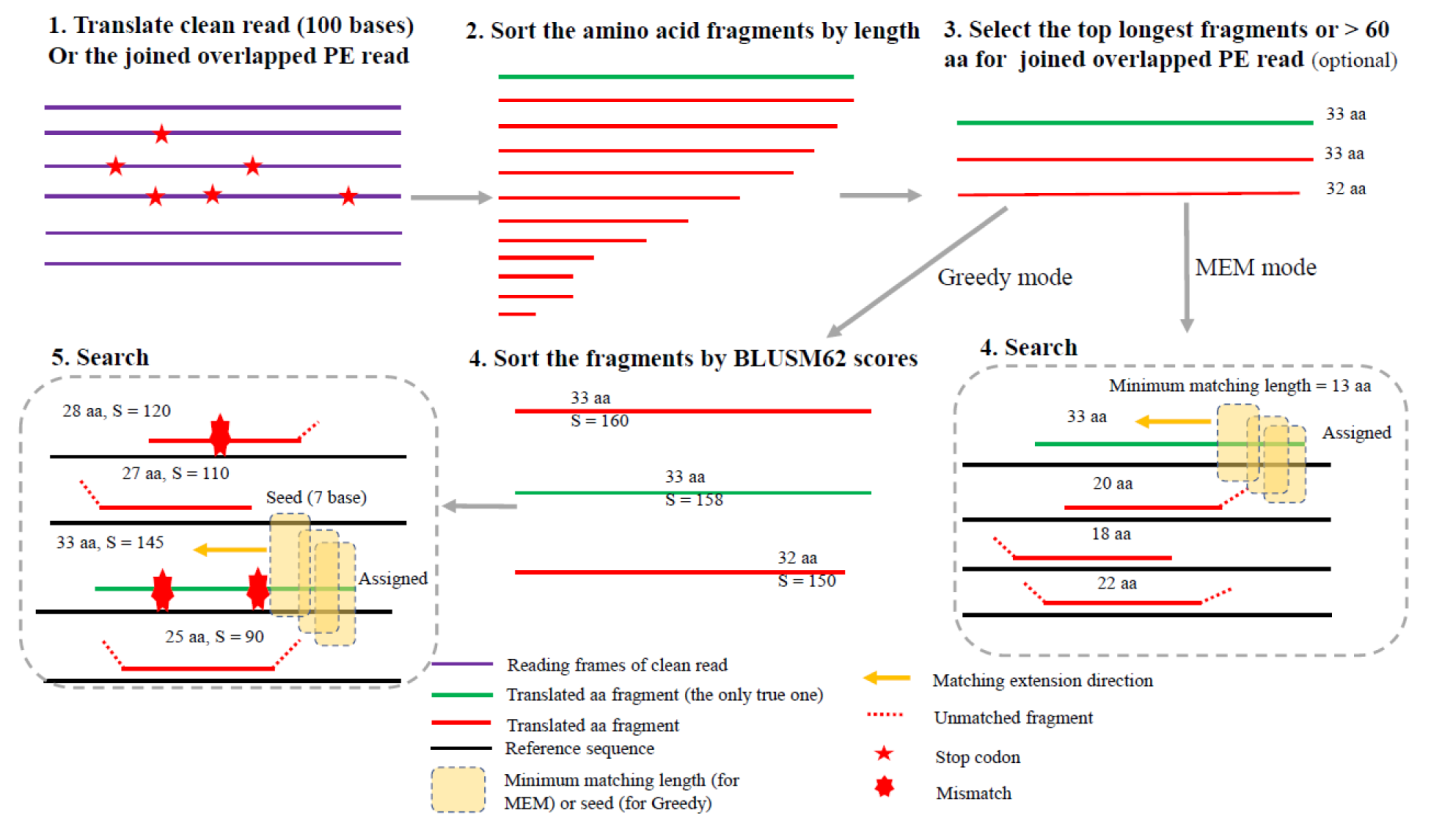
**

**Supplemental Figure S1. The MEM and Greedy mode of Seq2Fun.**

A clean read including the joined overlapped pair-end read is translated into all possible amino acid (aa) fragments using six reading frames and splits the fragments by stop codon (red star). The fragments are first sorted by length and then only select top longest fragments or select fragments > 60 aa for the joined overlapped paired-end read (optional, users can disable this). MEM mode starts the search for all the minimum length (orange rectangles) for the whole fragment and extends the match from right to left. The extension is terminated when reaching the left end of the query or the matching length is larger than the minimum matching length. The read with the longest matching length is assigned with its homolog’s id. The Greedy mode starts with a second sorting by the BLOSUM62 score. The searching starts with all the seeds (orange rectangles) with 7 bases (by default). The extension continues from right to left allowing mismatches until it reads the left end of the query or the matching score is larger than the minimum score. The read with the largest score is assigned with its homolog ID.


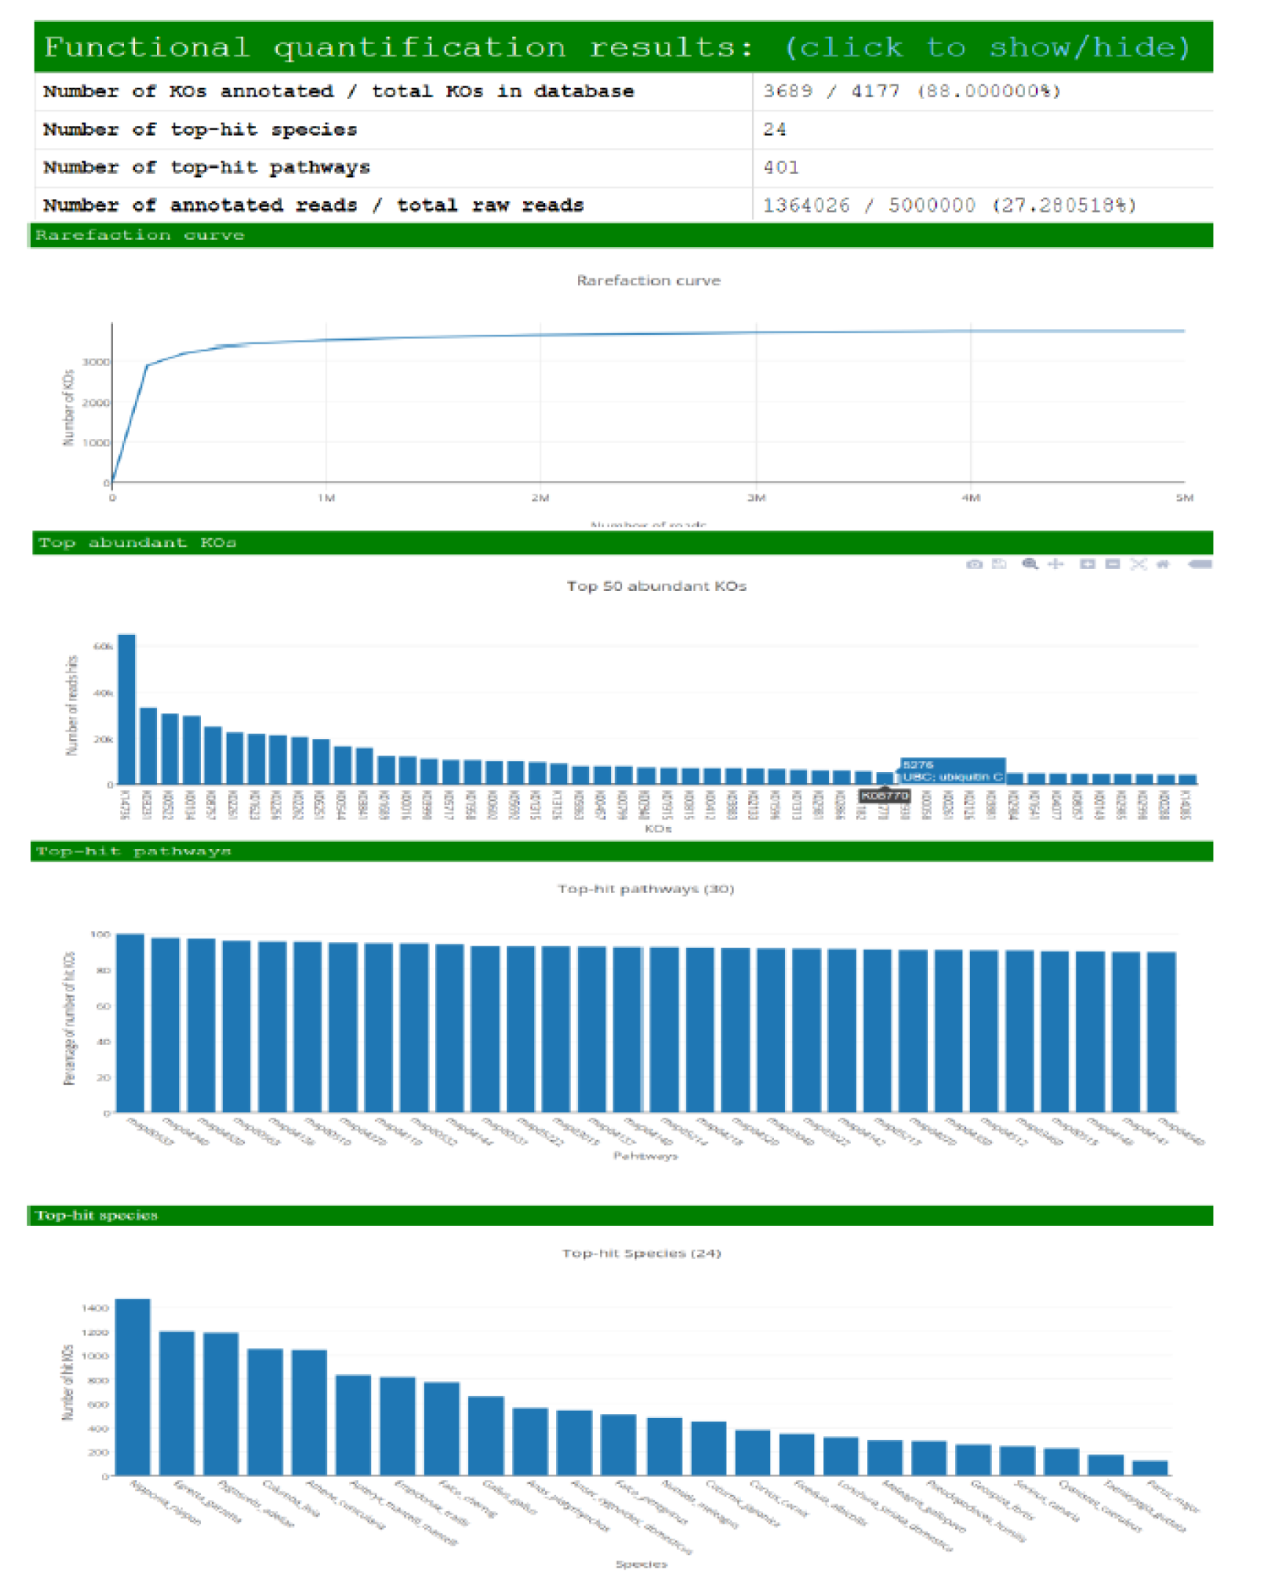


**Supplemental Figure S2. A simplified sample of the html report generated by Seq2Fun.**

The upper table provides a general summary about the mapping, followed by a rarefaction curve indicating the sequencing depth, the top abundant KEGG orthologs, top-hit pathways and species.


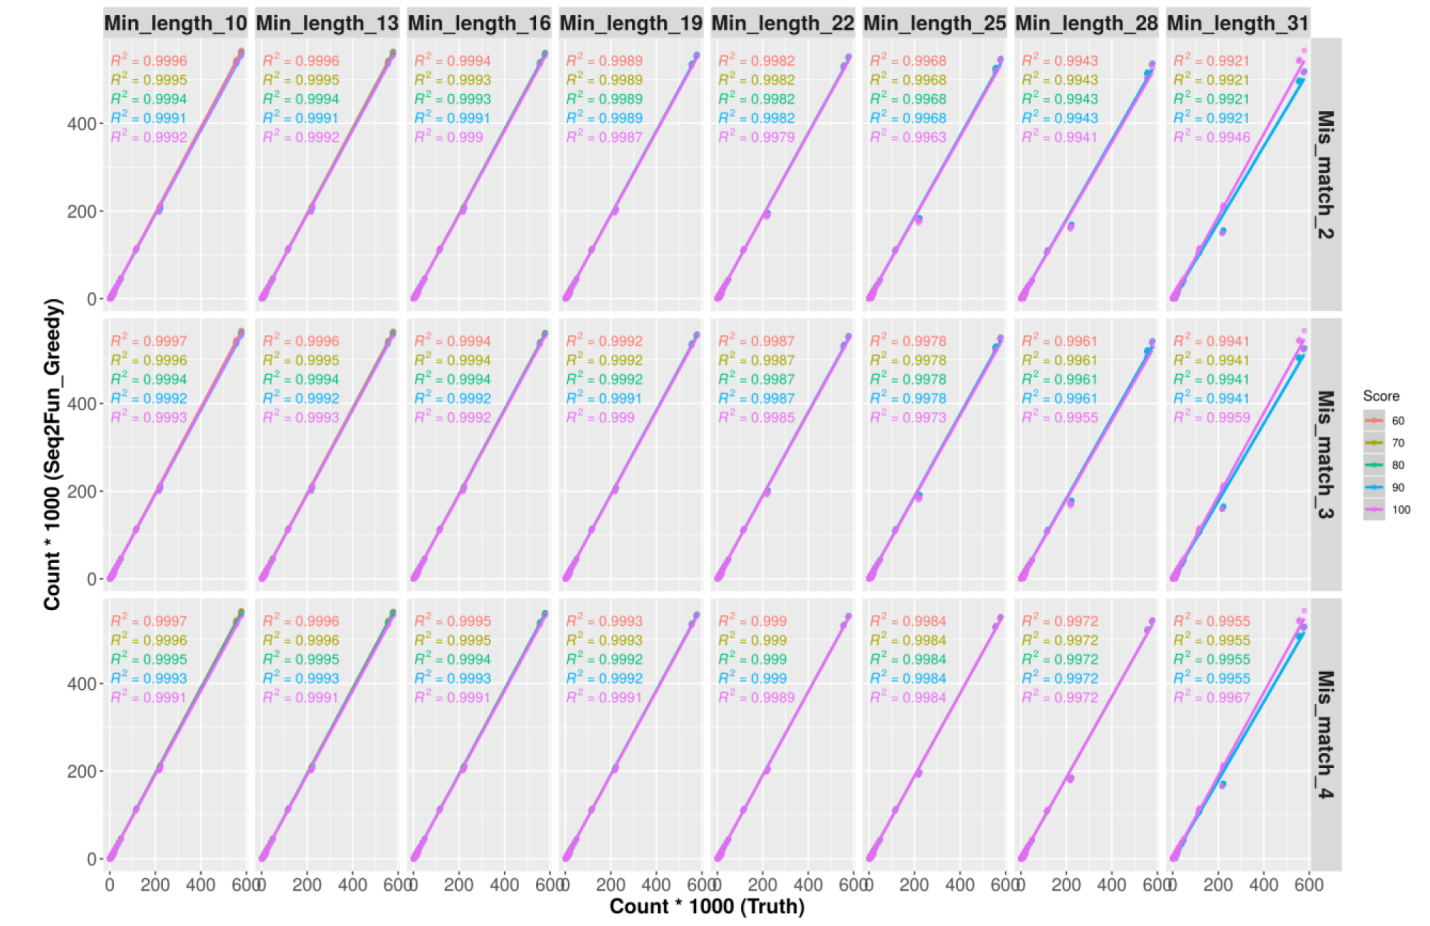


**Supplemental Figure S3. Evaluation of major parameters in the Greedy mode for abundance correlation on mouse simulated dataset.** Minimum matching length (min_length) had negative but subtle influence on the R2 (coefficient of determination) values for KEGG ortholog abundance. Number of mismatch (mismatch) generally had positive impact on R2 values, while minimum score (minscore) had almost no influence.


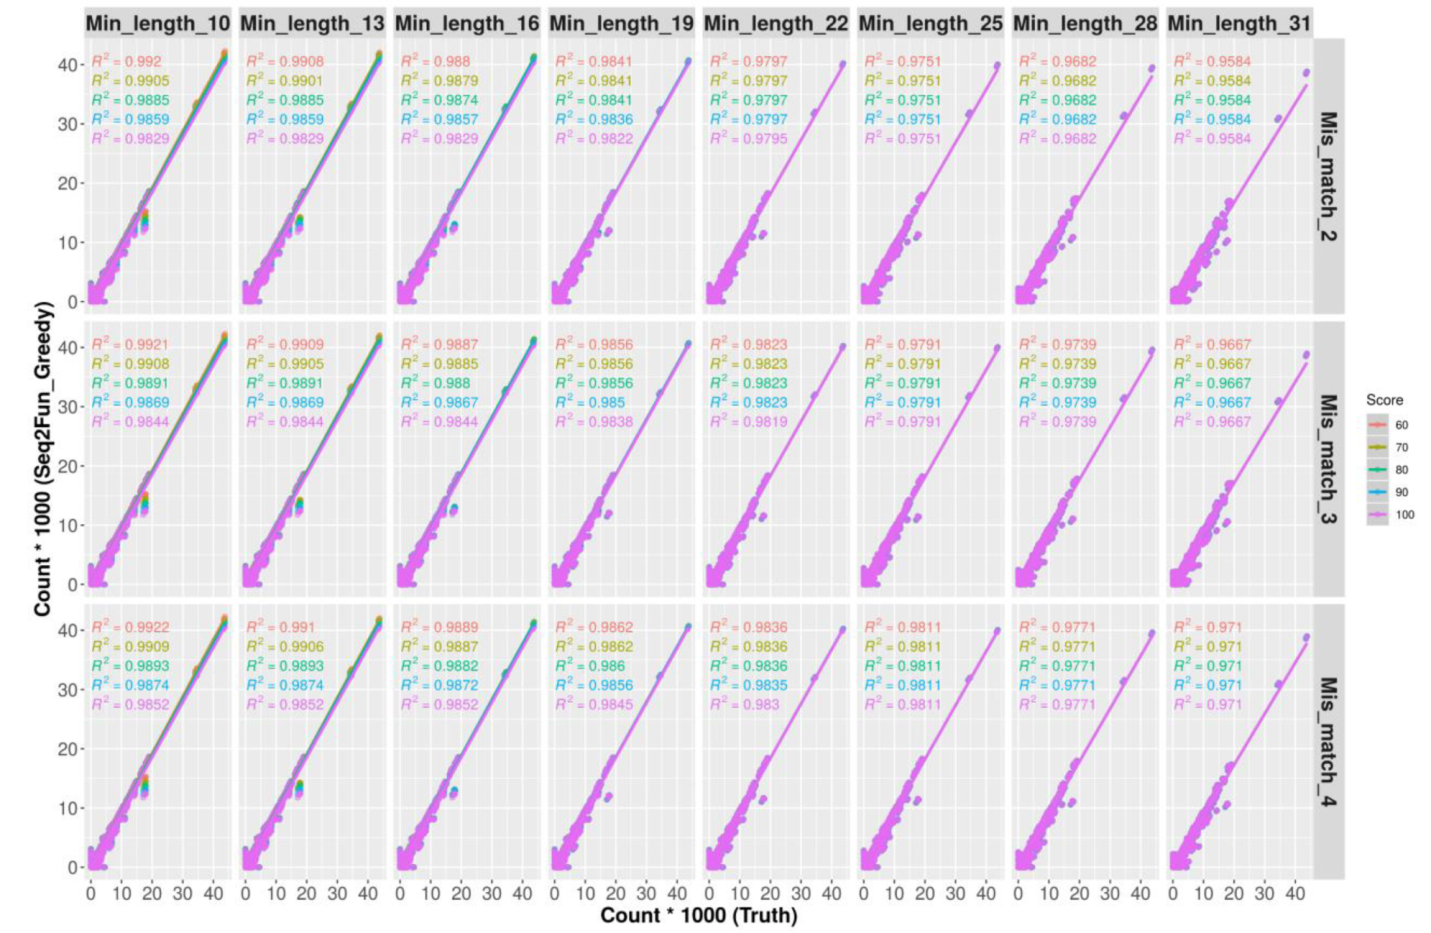


**Supplemental Figure S4. Evaluation of major parameters in the Greedy mode for abundance correlation on chicken simulated dataset**. Minimum matching length (minlength) had negative but subtle influence on the R2 (coefficient of determination) values for KEGG ortholog abundance. Number of mismatch (mismatch) generally had positive impact on R2 values, while minimum score (minscore) had almost no influence.


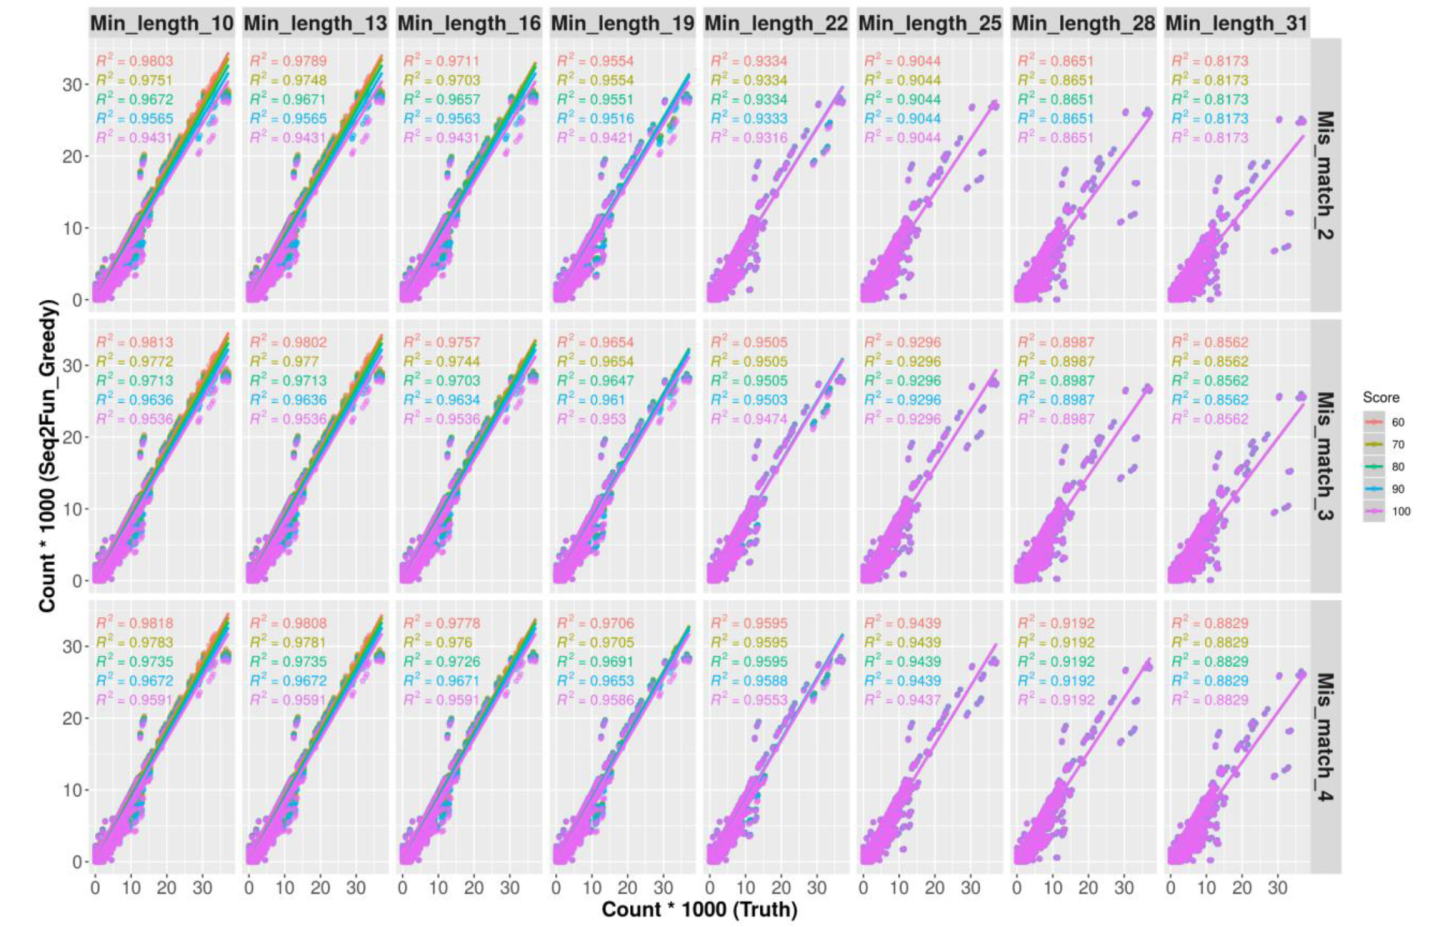


**Supplemental Figure S5. Evaluation of major parameters in the Greedy mode for abundance correlation on zebrafish simulated dataset**. Minimum matching length (minlength) had significantly negative influence on the R2 (coefficient of determination) values for KEGG ortholog abundance. Number of mismatch (mismatch) generally had positive impact on R2 values, while minimum score (minscore) had small negative influence.


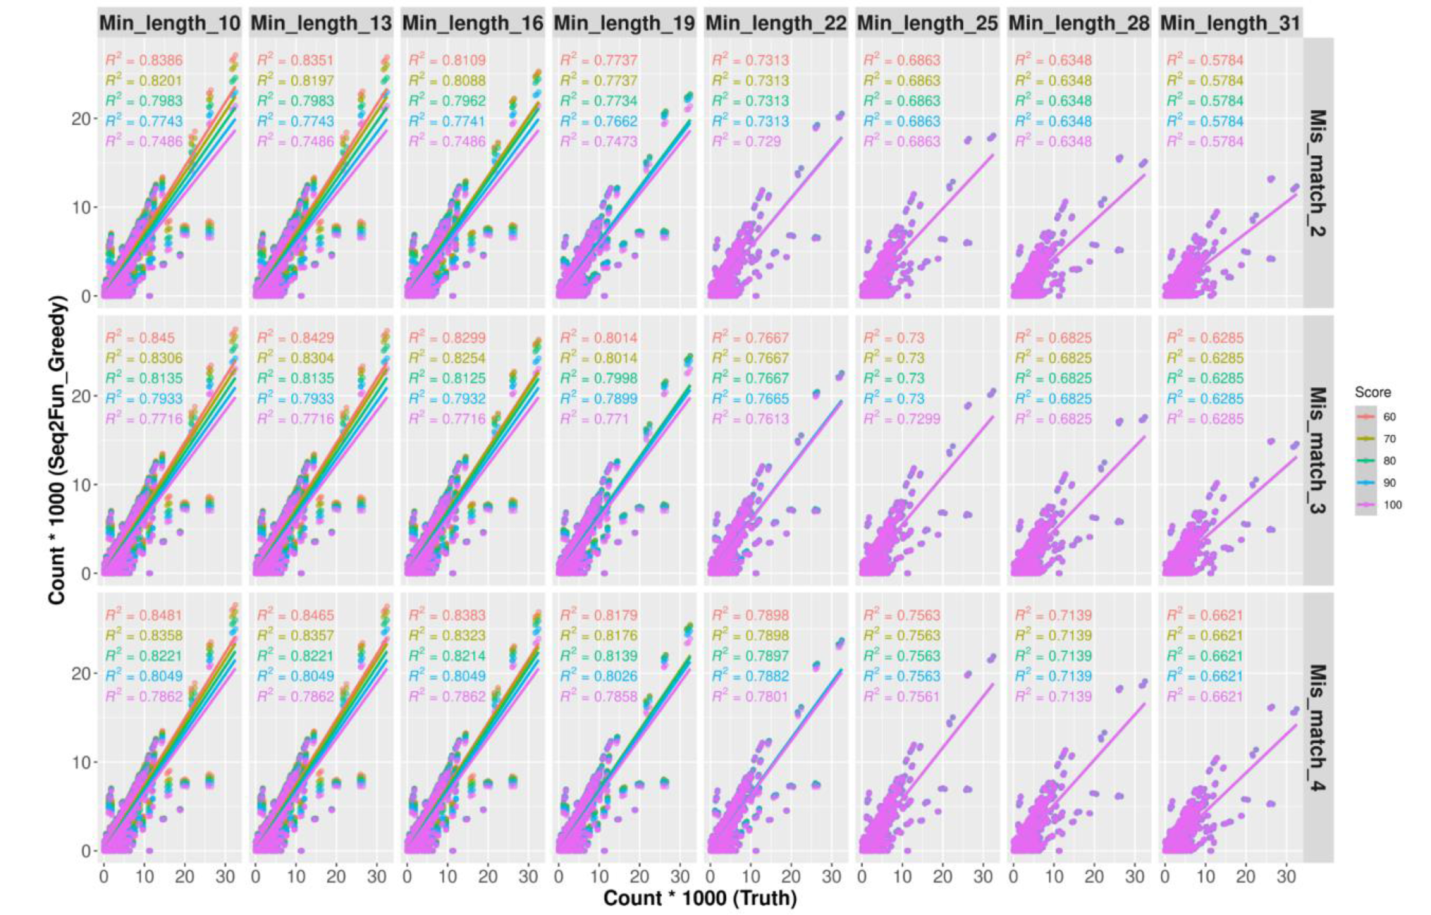


**Supplemental Figure S6. Evaluation of major parameters in the Greedy mode for abundance correlation on roundworm simulated dataset**. Minimum matching length (minlength) had significantly negative influence on the R2 (coefficient of determination) values for KEGG ortholog abundance. Number of mismatch (mismatch) generally had positive impact on R2 values, while minimum score (minscore) had small negative influence.


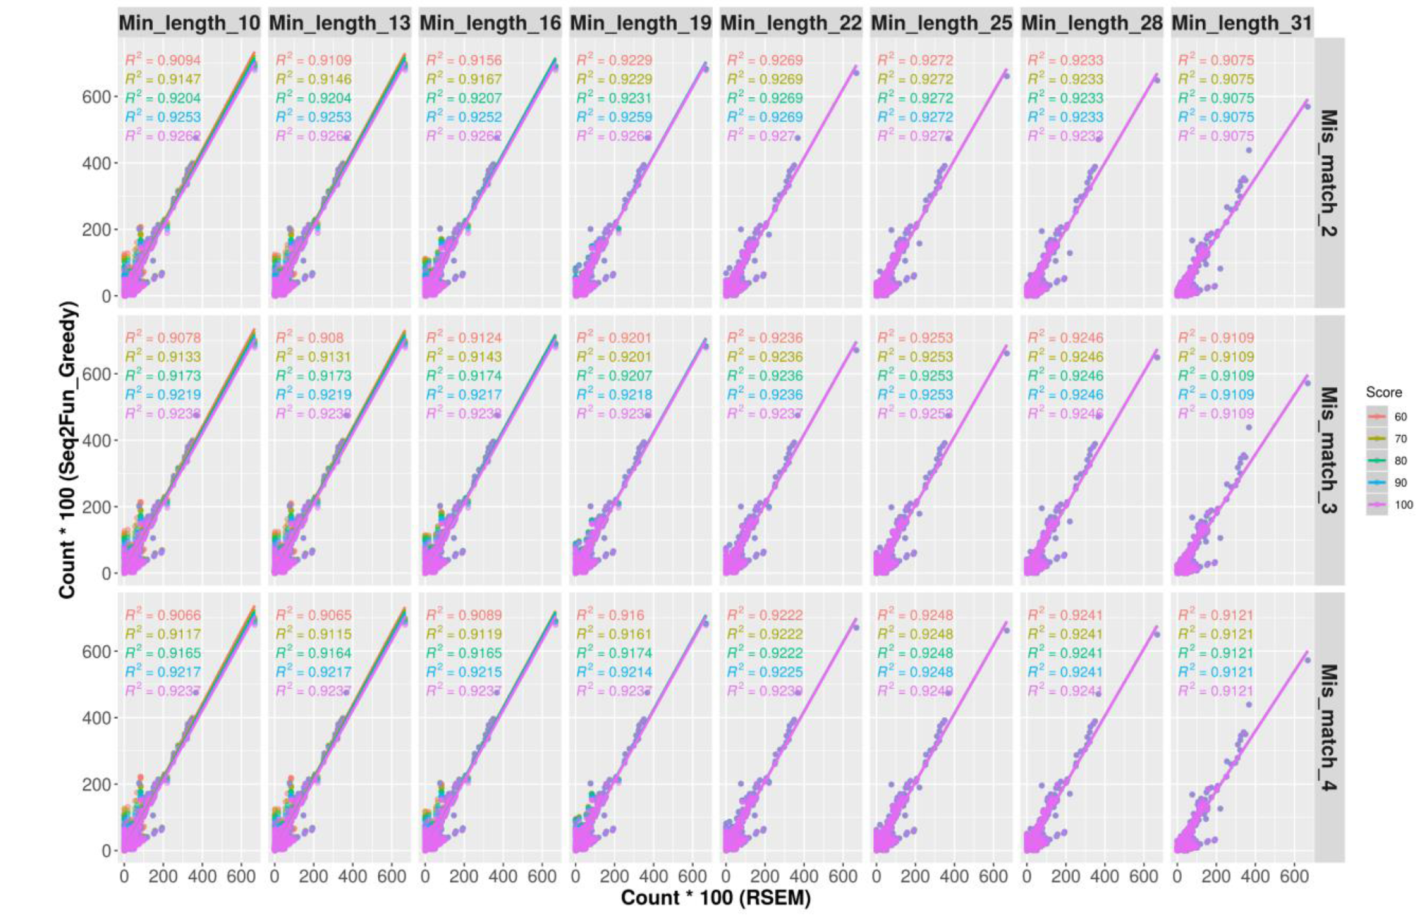


**Supplemental Figure S7. Evaluation of major parameters in the Greedy mode for abundance correlation on mouse real world dataset**. Overall, minimum matching length (minlength) had influence on the R2 (coefficient of determination) values for KEGG ortholog abundance with highest values around 25 to 28. Number of mismatch (mismatch) generally had negative impact on R2 values, while minimum score (minscore) had little influence.


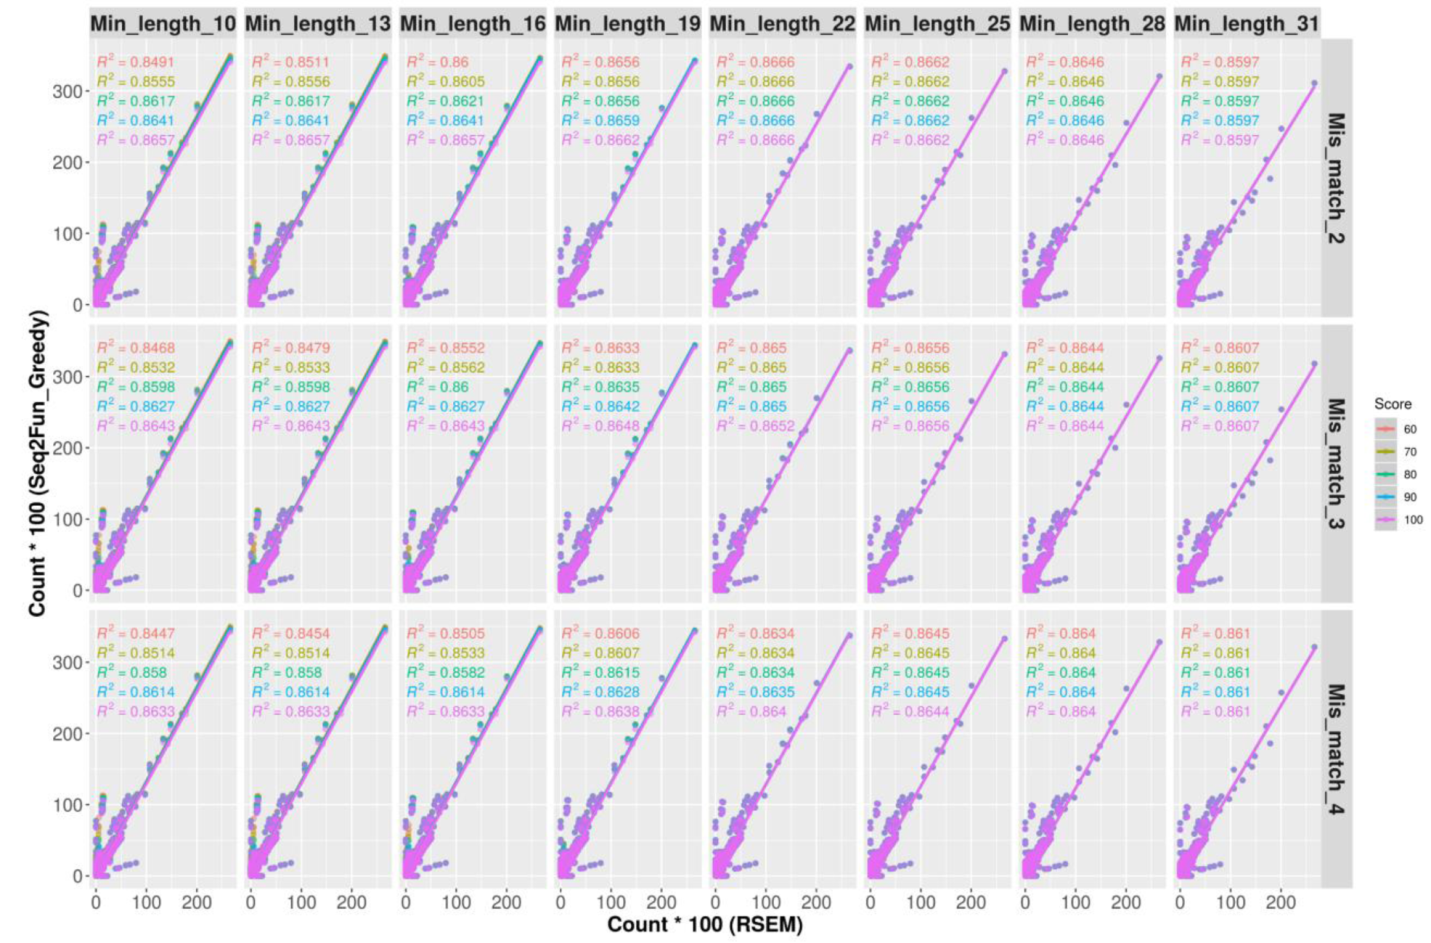


**Supplemental Figure S8. Evaluation of major parameters in the Greedy mode for abundance correlation on chicken real world dataset**. Overall, minimum matching length (minlength) had influence on the R2 (coefficient of determination) values for KEGG ortholog abundance with highest values from 19 to 28. Number of mismatch (mismatch) generally had negative impact on R2 values, while minimum score (minscore) had little influence.


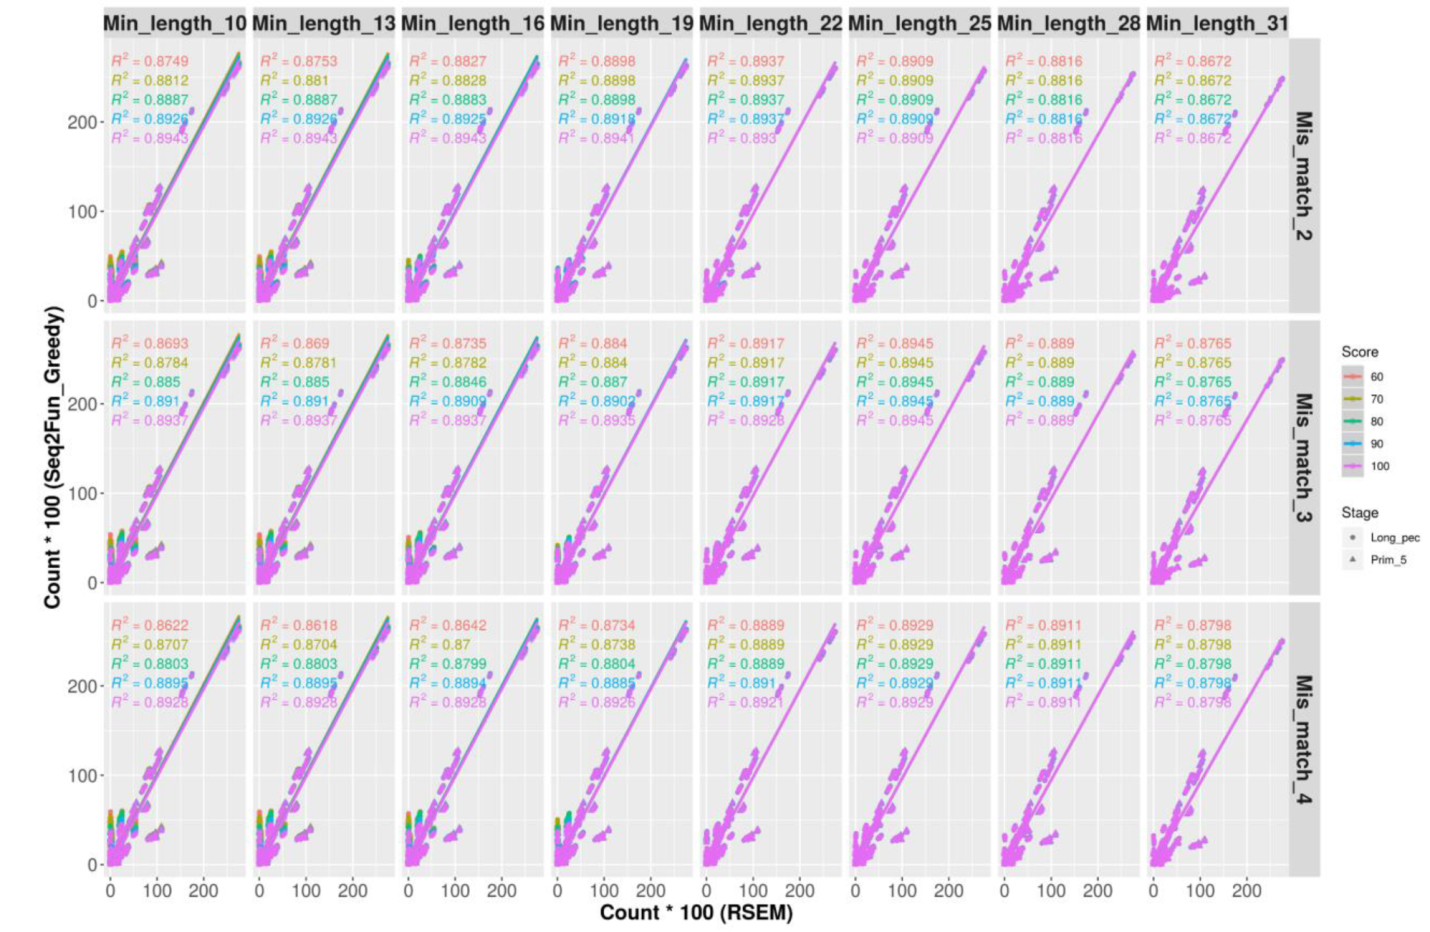


**Supplemental Figure S9. Evaluation of major parameters in the Greedy mode for abundance correlation on zebrafish real world dataset**. Overall, minimum matching length (min_length) had influence on the R2 (coefficient of determination) values for KEGG ortholog abundance with highest values from 19 to 28. Number of mismatch (mismatch) generally had negative impact on R2 values, while minimum score (minscore) had little influence.


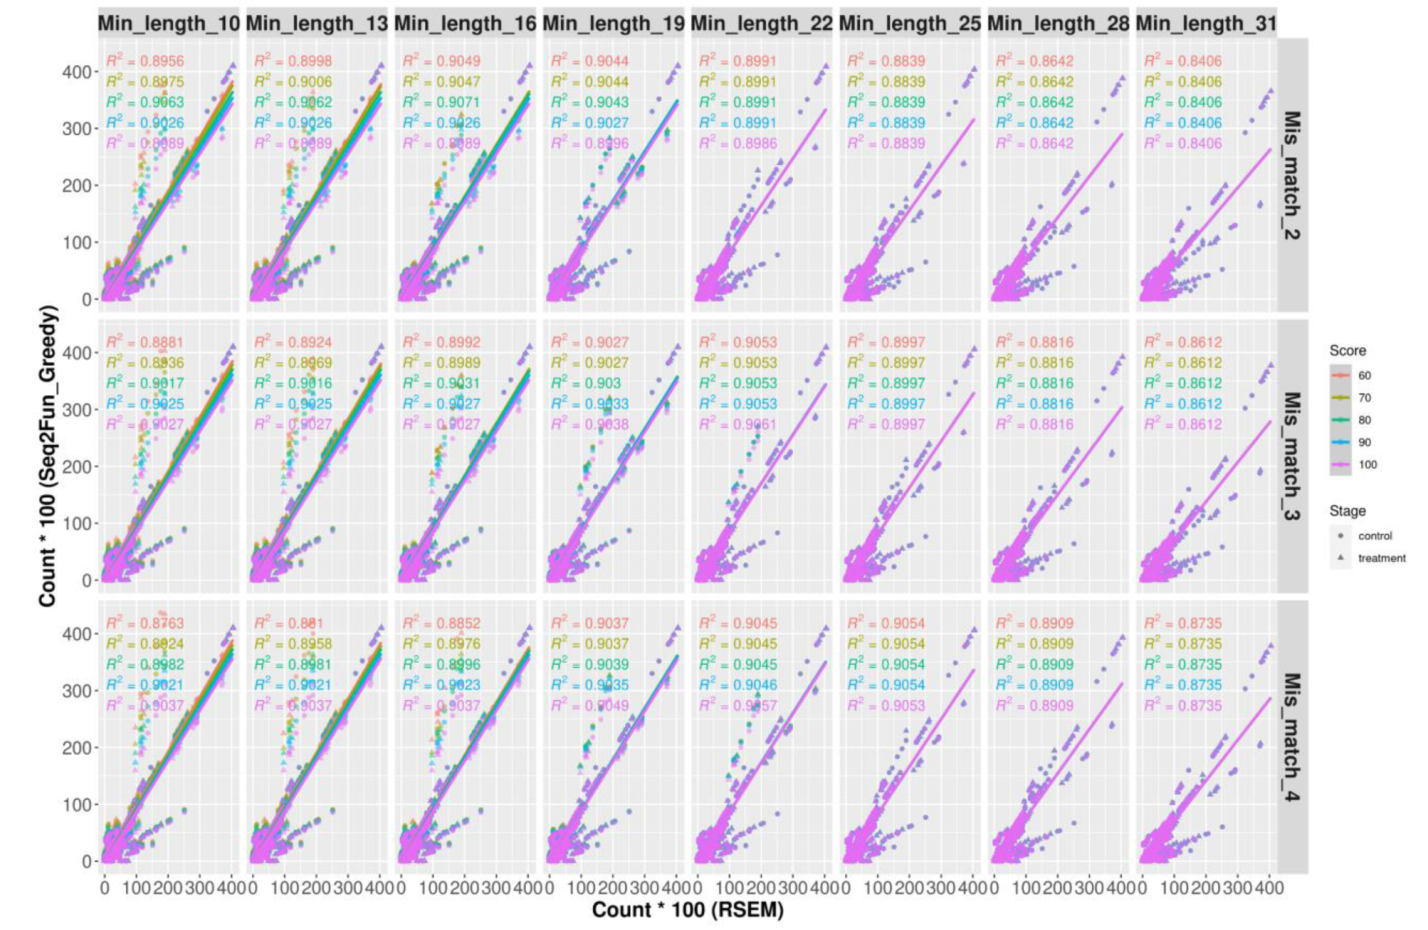


**Supplemental Figure S10. Evaluation of major parameters in the Greedy mode for abundance correlation on roundworm real world dataset**. Overall, minimum matching length (minlength) had influence on the R2 (coefficient of determination) values for KEGG ortholog abundance with highest values from 10 to 19. Number of mismatch (mismatch) generally had negative impact on R2 values, while minimum score (minscore) had little influence.
